# Supplementary material
Source: HighWire-hosted journal article supplement (https://www.ajnr.org/highwire/filestream/91283/field_highwire_adjunct_files/0/1463.pdf)
Supplement: 1463.pdf [file 1463.pdf]

|                              | Variable                                                                       | No hyperfusion of the colliculi (n=60) | Hyperperfusion of the colliculi (n=12) | P value |
|------------------------------|--------------------------------------------------------------------------------|----------------------------------------|----------------------------------------|---------|
| <b>Demographic variables</b> | Gender (number of males)                                                       | 37(62%)                                | 10(83%)                                | 0,196   |
|                              | Age                                                                            | 62,5                                   | 64,9                                   | 0,463   |
|                              | BMI (kg/m2)                                                                    | 29,4                                   | 29,5                                   | 0,948   |
|                              | Presence of cardiovascular risk factors                                        | 33 (55%)                               | 8 (67%)                                | 0,536   |
| <b>Symptoms</b>              | Headaches                                                                      | 11 (18%)                               | 3 (25%)                                | 1       |
|                              | Seizures                                                                       | 0 (0%)                                 | 3 (25%)                                | 0,004   |
|                              | Anosmia, ageusia                                                               | 5 (8%)                                 | 0 (0%)                                 | 0,582   |
|                              | Pyramidal tract signs                                                          | 15 (25%)                               | 3 (25%)                                | 1       |
|                              | Impaired consciousness                                                         | 29 (48%)                               | 6 (50%)                                | 1       |
|                              | Agitation                                                                      | 18 (30%)                               | 4 (33%)                                | 1       |
|                              | Confusion                                                                      | 25 (42%)                               | 4 (33%)                                | 0,751   |
| <b>Evolution</b>             | Number of days between first symptoms (mainly respiratory) and first brain MRI | 30,63                                  | 30,07                                  | 1       |
|                              | Length of hospital stay (days)                                                 | 51,51                                  | 53,4                                   | 0,873   |
|                              | Length of ICU stay (days)                                                      | 27,05                                  | 30,2                                   | 0,633   |
|                              | Lower PaO2/ FiO2                                                               | 133,7                                  | 124,4                                  | 0,546   |
|                              | Deaths                                                                         | 5 (8%)                                 | 1 (8%)                                 | 1       |
| <b>Treatment</b>             | Hydroxychloroquin                                                              | 19 (32%)                               | 6 (50%)                                | 0,319   |
|                              | Lopinavir/Ritonavir                                                            | 17 (28%)                               | 6 (50%)                                | 0,180   |
| <b>Brain MRI</b>             | Presence of MRI abnormality                                                    | 32 (53%)                               | 10 (83%)                               | 0,063   |
|                              | leptomeningeal enhancement                                                     | 13 (22%)                               | 7 (58%)                                | 0,016   |
|                              | White matter microhemorrhages                                                  | 11 (18%)                               | 4 (33%)                                | 0,258   |
|                              | Multifocal and circumscribed FLAIR white matter hyperintensities               | 8 (13%)                                | 2 (17%)                                | 1       |
|                              | Diffuse white matter FLAIR hyperintensities                                    | 6 (10%)                                | 2 (17%)                                | 0,613   |
|                              | Ischemic stroke                                                                | 6 (10%)                                | 4 (33%)                                | 0,056   |
|                              | FLAIR hyperintensities involving the mesial temporal lobe                      | 3 (5%)                                 | 1 (8%)                                 | 1       |
|                              | PRESS                                                                          | 0 (0%)                                 | 0 (0%)                                 | 1       |
|                              | Focal enhancement                                                              | 2 (3%)                                 | 0 (0%)                                 | 1       |

|                |                                                            |           |          |       |
|----------------|------------------------------------------------------------|-----------|----------|-------|
| <b>Biology</b> | Hemoglobin at admission (g/dL)                             | 12,2      | 11,3     | 0,116 |
|                | Leukocytes count at admission ( $10^9/L$ )                 | 7,52      | 11,07    | 0,002 |
|                | Highest CRP during hospitalization (mg/L)                  | 227       | 200      | 0,486 |
|                | Lowest platelets rate during hospitalization ( $10^6/L$ )  | 206912    | 188333   | 0,582 |
|                | Worst D Dimers during hospitalization ( $\mu\text{g/mL}$ ) | 9,33      | 9,71     | 0,881 |
|                | AST at admission (UI/L)                                    | 57,5      | 54,1     | 0,804 |
|                | ALT at admission (UI/L)                                    | 62,0      | 56,8     | 0,700 |
|                | PCR SARS-CoV-2 in CSF                                      | 2/30 (7%) | 0/7 (0%) | 1     |
